1 **Is it possible to keep the exoskeleton of the crab *Callinectes***  
2 ***ornatus* soft for several days?**

3 Short Title: **Effects of water quality on the molt of crab**

4 Diogo Barbalho Hungria<sup>1</sup>, Ubiratã de Assis Teixeira da Silva<sup>2</sup>, Leandro Ângelo Pereira<sup>3</sup>,

5 Ariana Cella-Ribeiro<sup>4</sup> and Antonio Ostrensky<sup>2</sup>

6 <sup>1</sup>Postgraduate Program in Animal Science, Federal University of Paraná, Curitiba - PR.

7 <sup>2</sup>Integrated Group of Aquaculture and Environmental Studies, Federal University of Paraná,  
8 Curitiba - PR.

9 <sup>3</sup>Federal Institute of Paraná, Paranaguá - PR.

10 <sup>4</sup>Postdoctoral researcher, Federal University of Rondônia, Porto Velho - RO

11 Corresponding author: Diogo Barbalho Hungria, Paraná avenue, 111, apt. 1101 - Cabral,  
12 Curitiba - PR, Brazil ZIP 80035-130. E-mail: [bhungria@gmail.com](mailto:bhungria@gmail.com)

13 Key words: Soft-shell; Molt; Arthropods; Calcium; Acidification; Ammonification

## 14 **Abstract**

15 Soft-shell crab is considered a gastronomic delicacy, reaching high values in the  
16 international market. The process of hardening of the crab's exoskeleton after  
17 moulting takes approximately two days to complete; however, the duration for which  
18 the shell remains at the consistency of high commercial value is only 3 hours on  
19 average. After this period, the shell assumes a consistency classified as "paper",  
20 later becoming "hard" again. The goal of this work was to evaluate the use of the  
21 crabs themselves to alter the chemical characteristics of the water and thereby  
22 increase the amount of time during which they can be marketed as "soft-shell crab".  
23 In this work, 241 individuals of *Callinectes ornatus* were used in two experiments. In  
24 the first experiment, the animals were maintained in a collective system with filtration  
25 and partial daily water renewal. In the second experiment, the crabs were maintained  
26 in a collective system with filtration but no water renewal. In Experiment 1, the  
27 chemical characteristics of the water remained unchanged over time ( $p > 0.05$ ), and  
28 the median time to hardening of the exoskeleton to the paper consistency after  
29 moulting was 3 hours. Over the course of Experiment 2, there was a significant  
30 reduction ( $p < 0.05$ ) in pH and significant increases in the ammonia and nitrite  
31 concentrations. When moulting occurred in water with a pH below 7.3 and total  
32 ammonia concentrations above 6.0 mg/L, the crabs' shells did not harden, and it was  
33 possible to keep them soft for up to 5 days.

## 34 **Introduction**

35 *Callinectes ornatus* Ordway, 1863 (Crustacea, Decapoda, Portunidae) is a  
36 swimmer crab found from North Carolina (USA) to the Rio Grande do Sul (Brazil). It  
37 occurs in areas with sand, mud or shell bottoms and inhabits estuarine to marine

38 areas at a depth of approximately 75 m (Carvalho and Couto, 2011; Melo-Filho,  
39 1996).

40 Similar to other arthropods, *C. ornatus* grows through a process of periodic  
41 exoskeleton changes; each shedding of the exoskeleton is known as ecdysis or  
42 moult (Drach, 1939; Freeman and Perry, 1985; Newcombe et al., 1949). Immediately  
43 after shedding its exoskeleton, the crab presents a soft and flexible integument that  
44 has a low level of calcification. In this phase, the animals can be commercialised and  
45 consumed whole as "soft-shell crab", a delicacy that is appreciated worldwide and  
46 that reaches high market values (Gaudé and Anderson, 2011; Oesterling, 1995;  
47 Perry et al., 2010). According to FAO (2013), the annual revenue generated from the  
48 production and marketing of soft-shell crab in 2012 was more than US\$ 940 million.

49 Immediately after moult,  $\text{CaCO}_3$  deposition begins on the protein matrix of the  
50 new exoskeleton. This process involves a complex system of absorption of  $\text{Ca}^{2+}$ ,  
51  $\text{CO}_2$ , and  $\text{HCO}_3^-$  and the synthesis of  $\text{CaCO}_3$  and other elements (Greenaway, 1985;  
52 Perry et al., 2001; Wheatly, 1999; Zanotto and Wheatly, 2002). The initially fragile  
53 exoskeleton undergoes rapid hardening, providing rigidity and mechanical protection  
54 for the animal. Under natural conditions, the hardening of the exoskeleton takes  
55 about two days to complete (Cameron and Wood, 1985). During the hardening  
56 process, the exoskeleton can be classified into four sequential levels of consistency:  
57 soft, leather, paper and hard (Freeman et al., 1987). Only the first two are valued in  
58 the international market of soft-shell crabs (Gaudé and Anderson, 2011; Oesterling,  
59 1995; Perry et al., 2010). However, the combined duration of the soft and leathery  
60 stages is very short in nature, rarely lasting more than 3 h (Cameron and Wood,  
61 1985), which obliges commercial producers to inspect all of the animals stocked in

62 the pre-moulting phase every 4 h on average (Oesterling, 1995). Extending the  
63 duration in which the crab shells remain at the consistencies of high market value  
64 would significantly reduce production costs (Perry et al., 2001). Furthermore, it would  
65 minimise the damage caused by rapid exoskeleton hardening, providing better  
66 quality and uniformity regarding the softness of the product.

67 The goal of this work was to test the viability of using the crab *C. ornatus* to alter the  
68 chemical characteristics of the water to extend the time during which the animals  
69 could be marketed as soft-shell crab.

## 70 **Material and Methods**

### 71 **Crab collection and maintenance**

72 Specimens of *C. ornatus* were obtained via trawling by professional fishers at  
73 the balneary of Shangri-la, municipality of Pontal do Paraná (25°37'S/48°25'O),  
74 Paraná, Brazil. Shrimp trawls 12 m in length and with 20 mm mesh were used. In  
75 each sampling campaign, on average, three trawls of approximately 50 min each  
76 were made. Immediately after crab collection from the net, the crabs were separated  
77 and transferred to two 70 L polyethylene tanks with lids, each containing 20 L of  
78 seawater. The tanks received continuous aeration supplied via an 18 W air  
79 compressor. Inside each tank were plastic screens with 2 mm mesh positioned to  
80 reduce contact and prevent fights between the animals and minimise injuries and  
81 deaths. Thereafter, 100% of the water was renewed every half hour during the  
82 campaign.

83 Immediately after capture, the animals were transported to the Marine  
84 Aquaculture and Restocking Center (CAMAR) of the Integrated Group of Aquaculture

85 and Environmental Studies (GIA), Federal University of Paraná (UFPR), at Pontal do  
86 Paraná (25°41'29.94"S, 48°27'57.09"W). The time elapsed between animal capture  
87 and arrival at the laboratory was consistently less than 4 h. Animals that were not  
88 used were returned to the sea.

89 In the laboratory, the crabs were maintained in 1,000 L tanks containing 100 L  
90 of seawater (30 psu) supplied with constant aeration for approximately 6 h. This  
91 period was purposely short since a large proportion of the captured individuals were  
92 very close to moult. Dead animals were discarded, and the live animals were  
93 classified by sex. Then, the crabs were inspected to determine the phase of the  
94 moulting cycle. Those individuals at the pre-ecdysis phase were selected for the  
95 experiments based on macroscopic indicators (visualisation of an inner line along the  
96 edges of the fifth pair of pleopods) (Drach, 1939; Drach and Tchernigovtzeff, 1967;  
97 Wehrtmann and Mena-Castañeda, 2003). The selected individuals were weighed on  
98 an analytical balance (Marte AL 500c, Brazil; accuracy of 0.01 g) and measured  
99 (width of the carapace, measured as the distance between the base of the largest  
100 lateral spines) with a pachymeter.

## 101 **Pilot experiments**

102 Two pilot experiments were carried out. The first experiment tested the  
103 influence of fasting on animal survival under laboratory conditions. The animals only  
104 began to die after 50 days without access to food. Based on this result and to  
105 potential feeding effects on water quality or the process of moult and hardening, the  
106 crabs were not fed during the 12 days of each of the main experiments.

107 The second experiment tested the influence of the non-renewal of water on  
108 hardening time. The time elapsed between moult and shell hardening was

109 significantly higher under water non-renewal than under the periodic renewal of  
110 water. In addition, a higher frequency of moult was observed at night (between 18:00  
111 and 06:00); this information informed the design of the experimental methodology  
112 described below.

## 113 **Experimental Design**

114 In both experiments, the saltwater had been previously chlorinated and  
115 maintained under constant aeration for 24 h. After this period, residual chlorine was  
116 neutralised (with 50% sodium thiosulfate), and the water was stored in the dark in  
117 25,000 L tanks. Before use in the experiments, the water was passed through  
118 mechanical filters of 5 and 25 µm mesh and a UV filter for disinfection. Two  
119 experiments were performed and are represented schematically in Figure 1.

### 120 **Experiment 1: Crab maintenance in a collective system with filtration** 121 **and partial daily water renewal**

122 Sixty-six *C. ornatus* crabs were individually placed in perforated pet bottles  
123 (600 mL) and distributed in a system consisting of 20 polyethylene tanks (71.0 x 35.5  
124 x 35.0 cm, containing 25 L of seawater each). The tanks were interconnected via a  
125 skimmer and a mechanical/biological filter system and were under constant aeration,  
126 continuous water recirculation and controlled photoperiod (14L:10D).

127 The animals were separated into two groups: A1, pre-ecdysis animals (n =  
128 46), and AC, control animals (at the inter-ecdysis stage) (n = 20). Each day  
129 throughout the experimental period (12 days), 1/3 of the total water volume of the  
130 system (333 L) was added, promoting mixing with the water already present, and an

131 approximately equivalent amount was removed, keeping the total water volume in the  
132 system constant.

133 Experiment 2: **Crab maintenance in a collective system with filtration**  
134 **and without water renewal**

135 One hundred and seventy-six *C. ornatus* crabs were individually placed in  
136 perforated (600 mL) pet bottles and distributed among 12 polyethylene tanks (71.0 x  
137 35.5 x 35.0 cm, containing approximately 30 L of water each). Each tank contained a  
138 protein skimmer and a mechanical/biological filter and was subjected to constant  
139 aeration, continuous water recirculation and controlled photoperiod (14L:10D).

140 The animals were subdivided into 3 groups: B1, pre-ecdysis animals (n = 83);  
141 B2, pre-ecdysis animals (n = 40); and BC, control inter-ecdysis animals (n = 52). In  
142 addition, three tanks containing water only were maintained throughout the  
143 experimental period (12 days) for comparison of physical and chemical water  
144 variables between these tanks and the 3 treatment groups. There was no water  
145 renewal during the experiment.

146 The animals in the B2 group were housed in the same tanks used to house  
147 group B1 and maintained in the same water used for group B1.

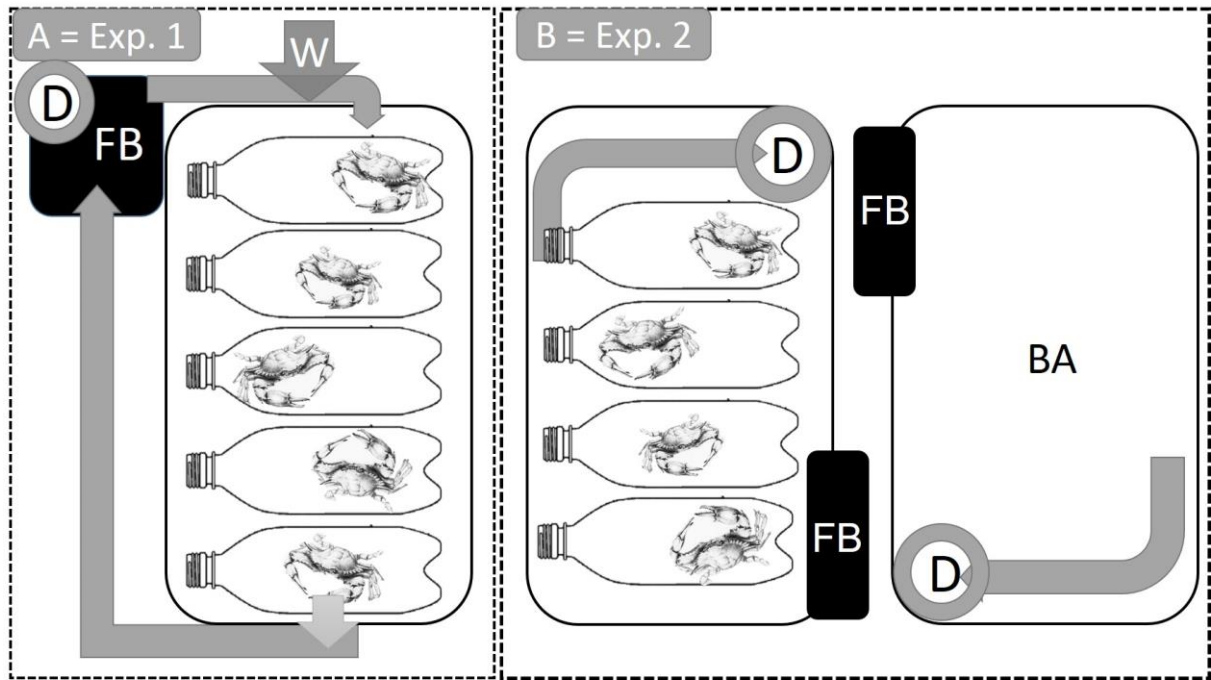

148

149 Figure 1. Schematic representations of the experimental systems. A: Experiment 1 (Exp. 1): 66 crabs  
 150 (46 in pre-ecdysis stage and 20 in inter-ecdysis stage) maintained in a collective system with filtration  
 151 and partial daily water renewal. B: Experiment 2 (Exp. 2): 175 crabs (123 in pre-ecdysis stage and 52  
 152 in inter-ecdysis stage) maintained in a collective system with filtration but without water renewal. A =  
 153 external water supply; D = protein skimmer; FB = mechanical / biological filter; BA = Water control.  
 154

155 Table 1 provides summary information on the subject animals and design of  
 156 the two experiments.

157 Table 1. Summary of the general conditions of the experiments performed to evaluate the effects of  
 158 water quality on the hardening time of the exoskeleton in *Callinectes ornatus* and width and weight  
 159 data of the animals (mean  $\pm$  SD). NA: not applicable.

| Experiment | Group | Experimental Unit  | Stage         | N  | Width (mm) ( $\pm$ sd) | Weight (g) ( $\pm$ sd) | Water Volume (L) | Water Sampling Frequency |
|------------|-------|--------------------|---------------|----|------------------------|------------------------|------------------|--------------------------|
| 1          | A1    | Tank               | Pre-ecdysis   | 46 | 45.4 ( $\pm$ 6.16)     | 15.04 ( $\pm$ 6.11)    | 0.6              | 24 h                     |
|            | AC    | Tank               | Inter-ecdysis | 20 | 61.55 ( $\pm$ 10.53)   | 35.57 ( $\pm$ 16.9)    | 0.6              | 24 h                     |
| 2          | B1    | Tank (Replicate 1) | Pre-ecdysis   | 27 | 50.7 ( $\pm$ 7.78)     | 16.64 ( $\pm$ 7.03)    | 32.5             | 12 h                     |
|            |       | Tank (Replicate 2) |               | 27 | 3.10 ( $\pm$ 7.36)     | 14.36 ( $\pm$ 7.47)    | 32.5             | 12 h                     |
|            |       | Tank (Replicate 3) |               | 29 | 47.5 ( $\pm$ 5.12)     | 15.11 ( $\pm$ 4.92)    | 32.5             | 12 h                     |
|            | B2    | Tank (Replicate 1) | Pre-ecdysis   | 14 | 48.1 ( $\pm$ 8.25)     | 16.46 ( $\pm$ 8.08)    | 30               | 12 h                     |
|            |       | Tank (Replicate 2) |               | 13 | 46.4 ( $\pm$ 7.02)     | 15.40 ( $\pm$ 6.7)     | 30               | 12 h                     |
|            |       | Tank (Replicate 3) |               | 13 | 47.0 ( $\pm$ 6.64)     | 14.75 ( $\pm$ 6.3)     | 30               | 12 h                     |
|            | BC    | Tank (Replicate 1) | Inter-ecdysis | 17 | 56.2 ( $\pm$ 2.9)      | 26.51 ( $\pm$ 5.07)    | 32.5             | 12 h                     |
|            |       | Tank (Replicate 2) |               | 17 | 59.7                   | 28.31                  | 32.5             | 12 h                     |



| Experiment | Group | Experimental Unit   | Stage | N  | Width (mm) ( $\pm$ sd) | Weight (g) ( $\pm$ sd) | Water Volume (L) | Water Sampling Frequency |
|------------|-------|---------------------|-------|----|------------------------|------------------------|------------------|--------------------------|
|            |       | 2)                  |       |    | ( $\pm$ 3.8)           | ( $\pm$ 6.1)           |                  |                          |
|            |       | Tank (Replicate 3)  |       | 18 | 56.65 ( $\pm$ 4.93)    | 26.54 ( $\pm$ 7.95)    | 32.5             | 12 h                     |
|            | BA    | Tank (3 Replicates) | NA    | NA | NA                     | NA                     | 32.5             | 12 h                     |

## 160 **Experimental Procedures**

161 During the experiments, the crabs were monitored every three hours on the  
162 first four days, every six hours on the following five days, and every 12 hours on the  
163 last three days of experimentation, preferably between 18:00 and 06:00 h. These  
164 times were selected based on the results of the pilot experiments.

165 Monitoring consisted of identifying animals undergoing the moulting process,  
166 removing any moulted exoskeletons (to prevent the animals from obtaining calcium  
167 by feeding on them), evaluating the consistency of the carapace of those animals  
168 that had moulted, and removing any dead animals. Evaluating the consistency of the  
169 exoskeleton was performed by pressing the carapace with an index finger. Sufficient  
170 pressure was applied to deform the carapace but not injure the animal or break the  
171 carapace when rigid. Based on the resistance to pressure and texture of the  
172 exoskeleton, its consistency (Co) was classified by the evaluator as follows: hard -  
173 before ecdysis (1), soft (2), leather (3), soft paper (4), hard (5) or hard paper - after  
174 ecdysis (6). To reduce and standardise the error, a single evaluator performed the  
175 consistency assessments in both experiments.

## 176 **Water analysis**

177 In both experiments, salinity (refractometer; Instrutemp, Brazil), temperature  
178 (digital thermometer), pH (AZ pH/mV/TDS /Temperature Meter 86505, Taiwan), and  
179 dissolved oxygen concentration (Oximeter YSI 550A, USA) were monitored daily in

180 all experimental units. Water samples were collected from the units, labelled and  
181 immediately frozen (-20 ° C) for later evaluation of the physical and chemical  
182 variables. For group A1, water collection was performed every 24 hours before the  
183 new water was added to the system. For groups B1, B2, BC and BA, 50 mL of water  
184 was collected every 12 h.

185 At the end of the experiments, the frozen water samples were analysed with  
186 respect to the following parameters: Na<sup>+</sup>, K<sup>+</sup>, Ca<sup>2+</sup> and NO<sub>3</sub> (electrodes of the  
187 LAQUAtwin series, Horiba Scientific®, Japan) and total ammonia (NH<sub>3</sub>+NH<sub>4</sub><sup>+</sup>) and  
188 NO<sub>2</sub><sup>-</sup> (SpectraMax® m2 spectrophotometer, USA). Measurements were performed  
189 following APHA (2005) and Büldt and Karst (1999). The determinations of Mg<sub>2</sub><sup>+</sup> and  
190 Cl<sup>-</sup> were performed using colourimetry (Labtest®, Brazil) at a wavelength of 540 nm  
191 and 470 nm, respectively (SpectraMax® m2, USA), according to the method  
192 described by Clarke (1950).

### 193 **Statistical analyses**

194 The survival of the animals during the experiments was analysed through  
195 Kaplan-Meier curves. The data were grouped by treatment (groups), and the  
196 normality of the distribution of each variable was tested by using Shapiro-Wilk test.  
197 Where the normality hypothesis was rejected, non-parametric Mann-Whitney or  
198 Kruskal-Wallis tests were used.

199 Multiple linear regression analysis was performed to model the influences of  
200 the physical and chemical variables that determine water quality on exoskeleton  
201 hardening time. The assumption of the independence of the physical and chemical  
202 variables was upheld, the hypothesis of autocorrelation and collinearity (using

203 Durbin-Watson and the serial error correlation tests) was rejected, and the normality  
204 of the error was confirmed.

205 To limit the number of variables and thereby minimise the complexity of the  
206 models without a significant loss of the information offered by the total set of original  
207 variables, we select only those variables that: 1) were statistically significant ( $p <$   
208  $0,05$ ) and; 2) contributed more than 5% to the coefficient of determination ( $R^2$ ) of the  
209 model or that caused the  $R^2$  value to move into a higher category when it was  
210 included in the model, following the classification proposed by Mukaka (2012): very  
211 weak::  $R^2 < 0,19$ ; weak:  $0,20 > R^2 < 0,39$ ; moderate:  $0,40 > R^2 < 0,69$ ; strong:  $0,70 >$   
212  $R^2 < 0,89$ ; very strong:  $R^2 > 0,90$ .

## 213 **Results**

### 214 **Ecdysis**

215 Significant effects of sex on survival rate, ecdysis, or exoskeleton post-ecdysis  
216 hardening time were not observed. Therefore, the data from males and females were  
217 pooled. In addition, water temperature ( $27.0 \pm 1.1$  ° C), salinity ( $31.0 \pm 2.1$  ups) and  
218 dissolved oxygen concentration ( $5.0 \pm 0.52$  mg/L) remained largely stable and did not  
219 significantly influence any of the dependent variables.

220 The moulting rate of the animals in pre-ecdysis at the beginning of the  
221 experiments ranged from 40 to 95%. Most moulting events occurred during the night,  
222 and 50% of the animals moulted between 52 and 80 hours after the beginning of the  
223 experiments. There was a significant effect of moulting on final mortality rate and on  
224 survival time after ecdysis (Table 2).

225 Table 2. General results of laboratory experiments to evaluate ecdysis in *Callinectes ornatus*.

| Exp. | Group | Stage | n <sub>1</sub> | Weight Gain (%) | Ecdysis Performed |                                    |    | Time to Ecdysis (h) |     |     | Mortality Rate (%) | Survival Time (h) |     |     |
|------|-------|-------|----------------|-----------------|-------------------|------------------------------------|----|---------------------|-----|-----|--------------------|-------------------|-----|-----|
|      |       |       |                |                 | Period            | n <sub>2</sub>                     | %  | 25%                 | 50% | 75% |                    | 25%               | 50% | 75% |
| 1    | A1    | Pre   | 46             | 56              | day<br>night      | 14 <sup>a</sup><br>24 <sup>b</sup> | 83 | 44.5                | 80  | 124 | 24 <sup>a</sup>    | 230               | -   | -   |
|      | AC    | Inter | 20             | NA              | NA                | NA                                 | NA | NA                  | NA  | NA  | 0 <sup>b</sup>     | -                 | -   | -   |
| 2    | B1    | Pre   | 83             | 69              | day<br>night      | 19 <sup>a</sup><br>59 <sup>b</sup> | 94 | 36                  | 52  | 78  | 78 <sup>c</sup>    | 107               | 168 | 212 |
|      | B2    | Pre   | 40             | 46              | day<br>night      | 3 <sup>a</sup><br>13 <sup>b</sup>  | 40 | 102                 | -   | -   | 78 <sup>c</sup>    | 174               | 228 | 413 |
|      | BC    | Inter | 53             | NA              | NA                | NA                                 | NA | NA                  | NA  | NA  | 26 <sup>a</sup>    | 255               | -   | -   |

226 *Exp.*: experiment number; *Pre*: pre-ecdysis; *Inter*: Inter-ecdysis; *n*<sub>1</sub>: number of individuals; *Weight Gain*: increase  
 227 *in post-ecdysis weight (%)*; *Period*: the period in which moult occurred; *n*<sub>2</sub>: number and percentage of crabs that  
 228 *performed ecdysis*; *Time to Ecdysis*: time (h) at which 25, 50 and 75% of the animals had moulted; *Mortality rate*  
 229 *(%)*; *Survival Time*: time (h) at which 25, 50 and 75% of the animals survived after ecdysis; *NA*: Not Applicable.  
 230 *Different letters indicate significant differences (p < 0.05) between the groups according to the Kruskal-Wallis test.*  
 231 *Experiment 1 (collective treatment with filtration and partial daily water renovation). A1: pre-ecdysis organisms;*  
 232 *AC (Control): organisms in inter-ecdysis. Experiment 2 (collective treatment with filtration but no water renewal).*  
 233 *B1: pre-ecdysis organisms; B2: tanks containing water previously used for group B1, with organisms in pre-*  
 234 *ecdysis; BC (Control): tanks with organisms in inter-ecdysis.*  
 235

## 236 Physical and chemical water parameters

237 In Experiment 1, the total ammonia (NH<sub>3</sub>+NH<sub>4</sub><sup>+</sup>) concentrations remained  
 238 below the limit of analytical detection, and the median pH was 8.5, with variation  
 239 between 8.1 and 8.5. The remaining physical and chemical parameters were  
 240 relatively stable throughout the experimental period (Table 3).

241 Table 3. Median and 1st and 3rd quartiles of the water quality  
 242 parameters in Experiment 1 (collective treatment with filtration and  
 243 partial daily water renewal).

| Parameter                           | Median | 25-75%        |
|-------------------------------------|--------|---------------|
| pH                                  | 8.50   | 8.4-8.5       |
| K <sup>+</sup> (mg/L)               | 380    | 370-390       |
| Ca <sup>2+</sup> (mg/L)             | 350    | 330-430       |
| Mg <sup>2+</sup> (mg/L)             | 589.5  | 573.3-602.6   |
| Na <sup>+</sup> (mg/L)              | 11,000 | 9,900-12,000  |
| Cl <sup>-</sup> (mg/L)              | 16,830 | 16,059-17,668 |
| TA (mg/L)                           | 0.0    | 0.0           |
| NH <sub>3</sub> (mg/L)              | 0.0    | 0.0           |
| NO <sub>2</sub> <sup>-</sup> (mg/L) | 1.30   | 1.29-1.30     |
| NO <sub>3</sub> (mg/L)              | 180    | 170-200       |

TA: Total ammonia (NH<sub>3</sub>+NH<sub>4</sub><sup>+</sup>)

244 In Experiment 2, only potassium and sodium concentrations presented  
 245 differences between the groups B1 and B2. There was a reduction in pH and  
 246 increases in total ammonia and nitrite concentrations in the experimental treatments  
 247 (pre-ecdysis organisms, B1 and B2) in relation to the control (BA, tanks containing

248 water only). The variables monitored in the BC tanks (inter-ecdysis organisms)  
 249 presented intermediate values relative to the other groups (Table 4).

250 Table 4. Median and 1st and 3rd quartiles of the water parameters in Experiment 2  
 251 (collective treatment with filtration but without water renewal).

| Parameter                           | Groups                                 |                                      |                                         |                                         |
|-------------------------------------|----------------------------------------|--------------------------------------|-----------------------------------------|-----------------------------------------|
|                                     | B1                                     | B2                                   | BA                                      | BC                                      |
|                                     | Median<br>25-75%                       | Median<br>25-75%                     | Median<br>25-75%                        | Median<br>25-75%                        |
| pH                                  | 6.7 <sup>b</sup><br>(6.3-7)            | 6.5 <sup>b</sup><br>(6.2-7)          | 8.4 <sup>a</sup><br>(8.3-8.4)           | 7.8 <sup>ab</sup><br>(6.8-8.1)          |
| K <sup>-</sup> (mg/L)               | 420.00 <sup>a</sup><br>(370-540)       | 280.00 <sup>b</sup><br>(230-330)     | 330.00 <sup>ab</sup><br>(260-370)       | 390.00 <sup>ab</sup><br>(290-420)       |
| Ca <sup>2+</sup> (mg/L)             | 430.00 <sup>a</sup><br>(400-480)       | 350.00 <sup>a</sup><br>(320-420)     | 430.00 <sup>a</sup><br>(360-490)        | 450.00 <sup>a</sup><br>(390-480)        |
| Mg <sup>2+</sup> (mg/L)             | 545.6 <sup>b</sup><br>(472.3-585.8)    | 551.2 <sup>b</sup><br>(531.8-622.5)  | 586.3 <sup>ab</sup><br>(573.3-597.4)    | 592.0 <sup>a</sup><br>(555.2-607.9)     |
| Na <sup>+</sup> (mg/L)              | 12,000 <sup>a</sup><br>(10,000-14,000) | 7,500 <sup>b</sup><br>(6,500-9,000)  | 11,500 <sup>ab</sup><br>(10,000-13,000) | 12,000 <sup>ab</sup><br>(10,000-14,000) |
| Cl <sup>-</sup> (mg/L)              | 18279 <sup>a</sup><br>(16,507-20,245)  | 11995 <sup>a</sup><br>(9,158-15,782) | 15830 <sup>a</sup><br>(14,705-17,473)   | 17602 <sup>a</sup><br>(16,122-19,278)   |
| TA (mg/L)                           | 6.8 <sup>b</sup><br>(5.7-10.5)         | 9.5 <sup>b</sup><br>(7.4-11.91)      | 0.0 <sup>a</sup><br>0.0                 | 1.1 <sup>ab</sup><br>(0.0-3.1)          |
| NH <sub>3</sub> (mg/L)              | 0.02 <sup>b</sup><br>(0.01-0.05)       | 0.02 <sup>b</sup><br>(0.01-0.05)     | 0.00 <sup>a</sup><br>0                  | 0.01 <sup>ab</sup><br>(0-0.08)          |
| NO <sub>2</sub> <sup>-</sup> (mg/L) | 4.7 <sup>b</sup><br>(2.8-6.5)          | 5.4 <sup>b</sup><br>(2.15-7.8)       | 1.3 <sup>a</sup><br>(1.3-1.4)           | 5.2 <sup>b</sup><br>(4.0-6.1)           |
| NO <sub>3</sub> (mg/L)              | 230 <sup>a</sup><br>(190-310)          | 260 <sup>a</sup><br>(200-340)        | 210 <sup>a</sup><br>(120-260)           | 230 <sup>a</sup><br>(150-280)           |

252 *B1: organisms in pre-ecdysis. B2: tanks containing water previously used for group B1 and pre-ecdysis crabs. BA*  
 253 *(Control): tanks containing water only. BC (Control): tanks with crabs in inter-ecdysis. Different letters indicate*  
 254 *significant differences (p < 0.05) between groups according to the Kruskal-Wallis test. TA: Total ammonia*  
 255 *(NH<sub>3</sub>+NH<sub>4</sub><sup>+</sup>).*

## 256 Influence of the physical and chemical water parameters on the 257 survival and moulting of *C. ornatus*

258 As expected, crab survival time was influenced by moulting regardless of the  
 259 experiment. The organisms of group B1 that underwent moult in the first 36 h showed  
 260 rapid exoskeleton hardening and low mortality rates. Therefore, the B1 data were  
 261 divided into two categories: M1, animals that moulted within the first 36 h, and M2,  
 262 those that moulted after 36 h. The survival of M1 animals was strongly influenced by  
 263 pH and total ammonia and nitrite concentrations, whereas the survival of the M2  
 264 animals was moderately influenced by the same variables.

265 Table 5 shows the multiple linear regression results. Crab survival rate was  
 266 significantly influenced by pH, nitrite and total ammonia in all of the experiments. The  
 267 remaining parameters had no significant influence ( $p < 0.05$ ) on the crab survival  
 268 time.

269 As expected, crab survival time was influenced by moulting regardless of the  
 270 experiment. The organisms of group B1 that underwent moult in the first 36 h showed  
 271 rapid exoskeleton hardening and low mortality rates. Therefore, the B1 data were  
 272 divided into two categories: M1, animals that moulted within the first 36 h, and M2,  
 273 those that moulted after 36 h. The survival of M1 animals was strongly influenced by  
 274 pH and total ammonia and nitrite concentrations, whereas the survival of the M2  
 275 animals was moderately influenced by the same variables.

276 Table 5. General results of multiple linear regression analysis of the influences of physical and  
 277 chemical parameters on crab survival time.

| Experiment                          | Group | Correlated Parameters               | Cases<br>n | p     | Adjusted R <sup>2</sup> | Correlation |
|-------------------------------------|-------|-------------------------------------|------------|-------|-------------------------|-------------|
| 1                                   | A1    | pH (max.)                           | 384        | 0.000 | 0,372                   | Weak        |
|                                     |       | TA (min.)                           |            | 0.000 |                         |             |
|                                     |       | NO <sub>2</sub> <sup>-</sup> (min.) |            | 0.000 |                         |             |
|                                     | AC    | NA                                  |            | NA    | NA                      | NA          |
| 3                                   | B1    | pH (max.)                           | 233        | 0.000 | 0,724                   | Strong      |
|                                     |       | TA (min.)                           |            | 0.000 |                         |             |
|                                     |       | NO <sub>2</sub> <sup>-</sup> (max)  |            | 0.000 |                         |             |
|                                     | M2    | pH (max.)                           | 318        | 0.000 | 0,681                   | Moderate    |
|                                     |       | TA (min.)                           |            | 0.000 |                         |             |
|                                     |       | NO <sub>2</sub> <sup>-</sup> (med.) |            | 0.000 |                         |             |
| 3                                   | B2    | pH (max.)                           | 495        | 0.000 | 0,430                   | Moderate    |
|                                     |       | TA (min.)                           |            | 0.000 |                         |             |
|                                     |       | NO <sub>3</sub> (med.)              |            | 0.000 |                         |             |
|                                     | BC    | pH (max.)                           | 452        | 0.000 | 0,743                   | Strong      |
| TA (max.)                           | 0.000 |                                     |            |       |                         |             |
| NO <sub>2</sub> <sup>-</sup> (max.) | 0.000 |                                     |            |       |                         |             |

278 *Experiment 1 (collective treatment with filtration and partial daily water renovation). A1: pre-ecdysis crabs; AC*  
 279 *(Control): inter-ecdysis crabs. Experiment 2: Collective treatment with filtration but no water renewal. B1: pre-*  
 280 *ecdysis crabs; B2: tanks containing water previously used for the B1 group, with pre-ecdysis crabs; BC (Control):*  
 281 *tanks with crabs in inter-ecdysis; M1: crabs of B1 Group that performed ecdysis within the first 36 hours; M2:*  
 282 *crabs that moulted after 36 hours. NA: Not applicable. TA: Total ammonia (NH<sub>3</sub>+NH<sub>4</sub><sup>+</sup>).*  
 283

284 The results of the multiple linear regression analysis of the effects of the  
 285 physical and chemical parameters on the time until either the shells fully hardened

286 (reached Co 6) or death are presented in Table 6. In Experiment 1, only pH had an  
 287 influence (weak) on the results. In experiment 2, pH, ammonia and nitrite had  
 288 moderate influences on the results.

289 Table 6. General results of multiple linear regression analysis of the influences of physical and  
 290 chemical parameters on the time until shell hardening or death after ecdysis.

| Experiment | Group | Correlated parameters                            | Cases (n) | p              | Adjusted R <sup>2</sup> | Correlation |
|------------|-------|--------------------------------------------------|-----------|----------------|-------------------------|-------------|
| 1          | A1    | pH (max.)                                        | 68        | 0,000          | 0,196                   | Weak        |
|            | M1    | pH (max.)                                        | 116       | 0,000          | 0,559                   | Moderate    |
| 2          | B1    | pH (max.)                                        | 136       | 0,000          | 0,410                   | Moderate    |
|            |       | AT (min.)                                        |           | 0,000          |                         |             |
|            | B2    | AT (min.)<br>NO <sub>2</sub> <sup>-</sup> (min.) | 203       | 0,000<br>0,001 | 0,657                   | Moderate    |

291 *Experiment 1 (collective treatment with filtration and partial daily water renovation). A1: crabs in pre-ecdysis.*  
 292 *Experiment 2 (collective treatment with filtration but no water renewal). B1: crabs in pre-ecdysis; B2: tanks*  
 293 *containing water previously used for the B1 group, with crabs also in pre-ecdysis; M1: crabs that moulted within*  
 294 *36 hours; M2: crabs that moulted after 36 hours. TA: Total ammonia (NH<sub>3</sub>+NH<sub>4</sub><sup>+</sup>).*

295 The duration at which the shell was at consistency 2 (i.e., the consistency with  
 296 the highest market value) was significantly higher in the M2 animals than in the M1  
 297 animals. Furthermore, none of the M2 individuals that moulted after 36 h achieved  
 298 Co 6 (hard) shells, whereas in the M1 group, more than half of the individuals had  
 299 shells that reached this consistency. In addition, 68% of individuals with shells that  
 300 hardened remain alive. Among those that did not achieve shell hardening, the  
 301 survival rate was only 15% (Table 7).

302 Table 7. Duration of *Callinectes ornatus* at shell consistencies 2 and 3 (Co 2 and Co 3) and associated  
 303 hardening, ecdysis and mortality data in group B1 (organisms initially in pre-ecdysis) of Experiment 2  
 304 (collective treatment with filtration but no water renewal). Different letters indicate a significant  
 305 difference (p < 0.05) between the groups (within a column) according to the Kruskal-Wallis or Mann-  
 306 Whitney test.  
 307

| Group | Co 2/3 (h) (min-max)       | n  | Hardening (%) |                     | Ecdysis (n (%)) | Dead (n (%))          |
|-------|----------------------------|----|---------------|---------------------|-----------------|-----------------------|
| M1    | 3 <sup>a</sup><br>(1-18)   | 32 | Yes           | (54%) <sup>a</sup>  | 19 (23%)        | 8 (42%) <sup>a</sup>  |
|       |                            |    | No            | (37%) <sup>a</sup>  | 13 (16%)        | 11 (85%) <sup>b</sup> |
| M2    | 61 <sup>b</sup><br>(3-129) | 46 | Yes           | -                   | 0               | -                     |
|       |                            |    | No            | (100%) <sup>b</sup> | 46 (55%)        | 43 (93%) <sup>b</sup> |

308 *Individuals who moulted before (M1) or after (M2) 36 hours.*

309 Table 8 shows the median, minimum and maximum values of the physical and  
 310 chemical parameters of water quality that most influenced crab survival time and  
 311 exoskeleton consistency: pH, ammonia and nitrite. The duration at each level of

312 consistency was highly related to the pH and concentration of total ammonia at the  
 313 time of moulting. When the levels of the physical and chemical parameters favoured  
 314 hardening, the time until the organisms reached Co 4 (soft paper) was short  
 315 (between two and four hours). In contrast, when the pH was below 7.3 and the total  
 316 ammonia concentration remained above 6 mg/L, the median time to Co 4 was 60 h.

317 When water renewal was not performed (Experiment 2), the pH and total  
 318 ammonia and nitrite concentrations varied significantly (Figure 2). As a result, there  
 319 was an increase in the carapace hardening time and a decrease in the number of  
 320 individuals reaching Co 6. The crabs of Experiment 1 (A1) and the animals that  
 321 moulted within the first 36 hours of Experiment 2 (M1) spent significantly less time at  
 322 Co 2 and Co 3 than did those that moulted after the first 36 hours (M2) in group B1  
 323 and those in group B2.

324 Table 8. Water quality parameter measurements and crab survival data registered in the experimental  
 325 units in which the crabs (*Callinectes ornatus*) moulted.

| Exp.   | Group  | Co  | Median (min-max)                |                                   |                                     |                               | Mortality (%) | Survival (h) |     |      |
|--------|--------|-----|---------------------------------|-----------------------------------|-------------------------------------|-------------------------------|---------------|--------------|-----|------|
|        |        |     | pH                              | TA (mg/L)                         | NO <sub>2</sub> <sup>-</sup> (mg/L) | Time (h)                      |               | 25 %         | 50% | 75 % |
| 1      | A<br>1 | 1   | 8.4 <sup>aA</sup><br>(8.4-8.6)  | 0 <sup>aA</sup><br>(0-0.3)        | 1.31 <sup>aA</sup><br>(1.28-1.50)   | 61 <sup>aAD</sup><br>(2-245)  | 15            |              |     |      |
|        |        | 2-3 | 8.4 <sup>abA</sup><br>(8.4-8.5) | 0 <sup>aA</sup><br>(0-0.3)        | 1.33 <sup>abA</sup><br>(1.29-1.33)  | 4 <sup>bA</sup><br>(1-9)      | 2             |              |     |      |
|        |        | 4-5 | 8.5 <sup>abA</sup><br>(8.3-8.6) | 0 <sup>aA</sup><br>(0-0.3)        | 1.30 <sup>abA</sup><br>(1.28-1.50)  | 26 <sup>cA</sup><br>(3-137)   | 4             | 0            | 0   | 0    |
|        |        | 6   | 8.5 <sup>bA</sup><br>(8.5-8.6)  | 0 <sup>aA</sup><br>(0-0.3)        | 1.3 <sup>bA</sup><br>(1.28-1.50)    | 155 <sup>dA</sup><br>(17-209) | 2             |              |     |      |
|        |        | 1   | 8.4 <sup>aA</sup><br>(7.6-8.4)  | 0 <sup>aA</sup><br>(0-4.8)        | 1.7 <sup>aB</sup><br>(1.3-2.72)     | 30 <sup>aC</sup><br>(0-36)    | 9             |              |     |      |
| 2      | B<br>1 | 2-3 | 7.6 <sup>bA</sup><br>(6.7-8.4)  | 4.8 <sup>bA</sup><br>(0-9.8)      | 2.7 <sup>bA</sup><br>(1.3-3.22)     | 3 <sup>bA</sup><br>(1-18)     | 3             | 69           | 150 | -    |
|        |        | 4-5 | 7.0 <sup>cD</sup><br>(5.7-8.3)  | 6.1 <sup>cD</sup><br>(1.1-16.5)   | 3.2 <sup>cC</sup><br>(1.67-7.85)    | 42 <sup>cC</sup><br>(21-234)  | 31            |              |     |      |
|        |        | 6   | 6.5 <sup>dB</sup><br>(5.5-7.7)  | 8.2 <sup>dB</sup><br>(4.5-16.5)   | 5.6 <sup>dB</sup><br>(2.27-8.02)    | 183 <sup>CA</sup><br>(55-240) | 20            |              |     |      |
|        |        | 1   | 7.1 <sup>aB</sup><br>(5.7-8.4)  | 6.0 <sup>aB</sup><br>(0-16.5)     | 2.8 <sup>aC</sup><br>(1.3-7.85)     | 60 <sup>aBD</sup><br>(36-192) | 2             |              |     |      |
|        |        | 2-3 | 6.6 <sup>bC</sup><br>(5.5-7.5)  | 7.7 <sup>bD</sup><br>(3.9-16.5)   | 5.6 <sup>bB</sup><br>(2.27-8.02)    | 61 <sup>aC</sup><br>(3-129)   | 52            | 66           | 91  | 107  |
| B<br>2 | M2     | 4-5 | 6.5 <sup>bC</sup><br>(5.5-7.3)  | 9.1 <sup>cC</sup><br>(4.5-16.5)   | 5.6 <sup>bD</sup><br>(2.27-8.02)    | 45 <sup>aAC</sup><br>(3-222)  | 35            |              |     |      |
|        |        | 1   | 6.5 <sup>aC</sup><br>(5.3-8.1)  | 9.3 <sup>aC</sup><br>(3.3-14.7)   | 5.2 <sup>aD</sup><br>(1.35-9.40)    | 177 <sup>aB</sup><br>(0-186)  | 38            | 58           | 94  | 144  |
|        |        | 2-3 | 6.5 <sup>aC</sup><br>(5.3-8.1)  | 10.1 <sup>abC</sup><br>(3.3-14.7) | 6.3 <sup>aBC</sup><br>(1.35-9.40)   | 64 <sup>bBC</sup><br>(0-186)  | 20            |              |     |      |



|     | (5.8-8.1)         | (3.4-14.7)         | (1.53-9.40)        | (18-126)           |    |
|-----|-------------------|--------------------|--------------------|--------------------|----|
|     | 6.5 <sup>aC</sup> | 11.2 <sup>bC</sup> | 4.2 <sup>aBC</sup> | 80 <sup>bABC</sup> | 20 |
| 4-5 | (5.8-7.6)         | (4.2-14.7)         | (1.53-9.40)        | (12-180)           |    |

326 *Exp.: Experiment 1 (collective treatment with filtration and partial daily water renovation), Experiment 2 (collective*  
327 *treatment with filtration but no water renewal). A1 and B1: water not used previously; B2: tanks containing water*  
328 *used previously for the group B1; M1: crabs that moulted within the first 36 hours; M2: crabs that moulted after 36*  
329 *hours. Co: consistency. TA: total ammonia. Time: Length of stay at a given consistency. Different letters indicate*  
330 *significant differences (p < 0.05) according to the Kruskal-Wallis test. Lowercase letters indicate differences in*  
331 *carapace consistency within the same group. Uppercase letters indicate differences in carapace consistency*  
332 *among groups.*

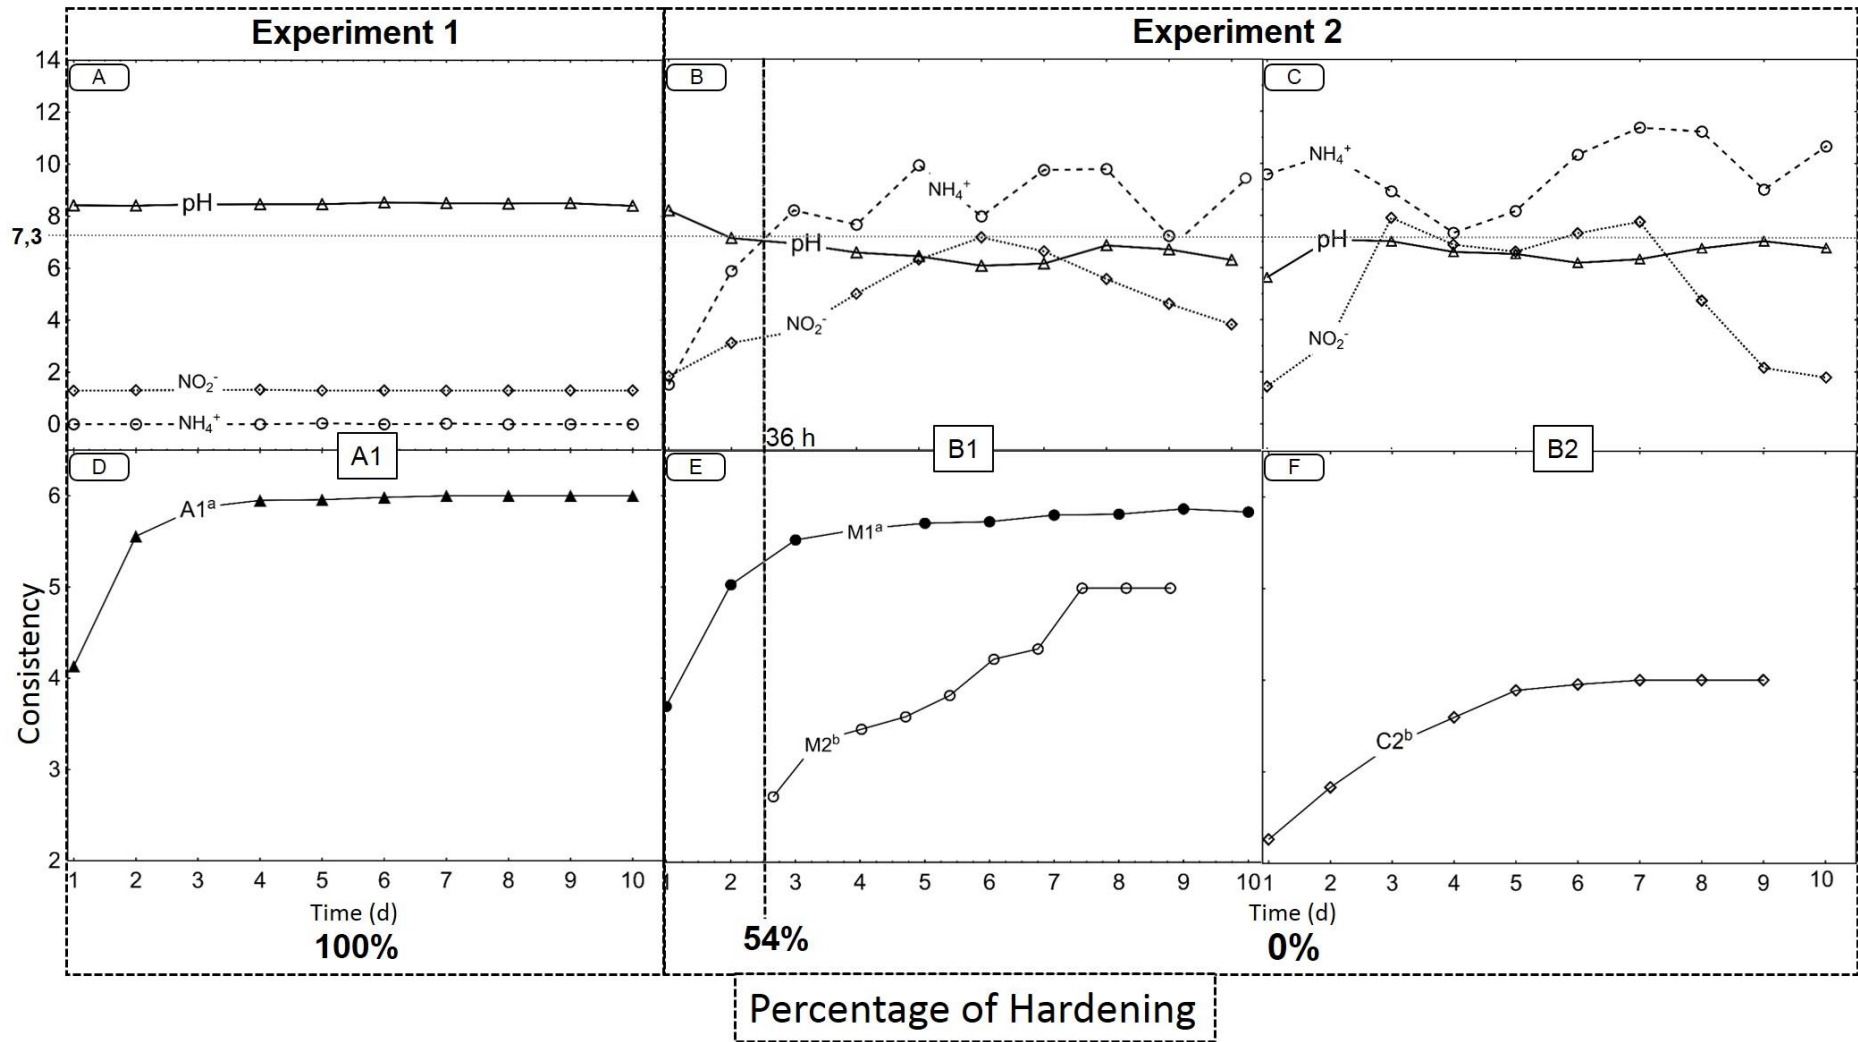

333  
334  
335  
336  
337  
338

Figure 2. Median pH, total ammonia (mg/L), nitrite ( $\text{NO}_2^-$ ) (mg/L) (A, B and C) and carapace consistency (2 - soft, 3- leather, 4 - soft paper, 5 - hard, paper 6 - hard) over time (in days) (D, E and F). Experiment 1: collective treatment with filtration and partial daily water renewal (66 crabs tested, 46 in pre-ecdysis and 20 in inter-ecdysis stage). Experiment 2: collective treatment with filtration but without water renewal (175 crabs tested, 123 in pre-ecdysis and 52 in inter-ecdysis stage). A1 (46 crabs in pre-ecdysis stage) and B1 (86 crabs in pre-ecdysis stage divided in three replicas): previously unused water and organisms in pre-ecdysis. B2 (40 crabs in

339 pre-ecdysis stage): organisms maintained in the reused water of group B1. M1: 32 crabs that moulted within the first 36 hours. M2:  
340 46 crabs that moulted after 36 hours. Different letters indicate significant differences ( $p < 0.05$ ) among groups according to the  
341 Kruskal-Wallis test.

## 342 Discussion

343 An issue repeatedly debated among those who investigate the shedding and  
344 hardening process in crustaceans is the importance of calcium, the main constituent  
345 element of the exoskeleton (Greenaway, 1985), in this process (Cameron, 1985;  
346 Cameron and Wood, 1985; Clarke and Wheeler, 1922; Freeman and Perry, 1985;  
347 Granado e Sá et al., 2010; Greenaway, 1983; Mangum et al., 1985; Middlemiss et  
348 al., 2016; Neufeld and Cameron, 1992; Pan et al., 2006; Perry et al., 2001;  
349 Robertson, 1960; Welinder, 1974; Wheatly et al., 2001; Wheatly, 1997; Wheatly,  
350 1999; Wheatly et al., 2002; Zanotto and Wheatly, 2002). The lack of significant  
351 correlations between the concentrations of  $\text{Ca}^{2+}$  and  $\text{Mg}^{2+}$  in water and either  
352 carapace hardening or *C. ornatus* survival does not indicate that calcium is not  
353 important in this process. On the contrary, it indicates that certain processes can  
354 directly interfere with the physiology of the absorption and immobilisation of  $\text{Ca}_2^+$  in  
355 the exoskeleton and thereby significantly increase the time that these animals remain  
356 soft after moult.

357 The organisms of Experiment 1 (subjected to daily water renewal) that  
358 underwent ecdysis hardened rapidly, achieving paper consistency (Co 4) a median of  
359 4 h after moult. This finding is consistent with studies conducted with *C. sapidus*  
360 (Cameron and Wood, 1985; Freeman et al., 1987). Similar results were observed  
361 among the crabs in Experiment 2 that moulted in water with a pH above 7.6 and a  
362 total ammonia concentration below 4.8 mg/L, with Co 4 achieved after a median time  
363 of 2 to 3 h. However, among the animals that began moulting in water with a pH  
364 below 7.3 and a total ammonia concentration above 6 mg/L, up to 129 h (median of  
365 more than 60 h) elapsed before either reaching Co 4 or death.

366 To understand this result, it is necessary to understand the chemical  
367 processes involved in the calcification of the crab exoskeleton. In a closed system  
368 with water recirculation, it is expected that over time there will be a reduction in the  
369 concentration of free  $\text{Ca}_2^+$ , due mainly to the immobilisation of  $\text{Ca}_2^+$  in the form of  
370  $\text{CaCO}_3$  during exoskeleton hardening (Perry et al., 2001). This immobilisation can be  
371 represented by the following equation:

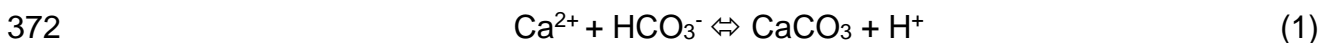

373 With the increased demands for  $\text{Ca}_2^+$  and  $\text{HCO}_3^-$ , crabs begin to consume  
374 both metabolic and external  $\text{CO}_2$ .  $\text{CO}_2$  reaches its highest internal concentrations at  
375 moulting time (Mangum et al., 1985), increasing the availability of internal  $\text{HCO}_3^-$   
376 (Cameron and Wood, 1985). As soon as moulting occurs, the enzyme carbonic  
377 anhydrase (CA), present mainly in the epithelium and the gills, is activated (Mangum  
378 et al., 1985), accelerating the reaction:

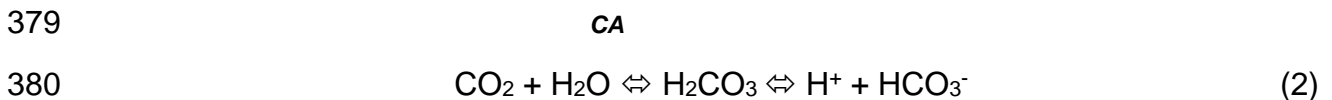

381 As explained by Detours et al. (1968) and Zeebe and Wolf-Gladrow (2001),  
382 the formed carbonic acid tends to be buffered by the carbonate-bicarbonate system.  
383 This process results in an increase in the fraction of  $\text{CO}_3^-$  and acidification of the  
384 medium (Greenaway, 1974; Mangum et al., 1985; Wheatly, 1997). However, over  
385 time, the natural acid neutralisation capacity of the system becomes compromised,  
386 and the medium tends to acidify as a result, increasingly compromising the crab's  
387 capacity to deposit  $\text{CaCO}_3$  in its exoskeleton. According to Cameron and Wood  
388 (1985), the calcification process can be compromised if the pH outside the body is  
389 less than 0.3 to 0.5 above the internal pH.

390           However, in addition to consuming  $\text{HCO}_3^-$  post-ecdysis, the organism excretes  
391  $\text{H}^+$  or an equivalent ion such as  $\text{NH}_4^+$  (Cameron, 1985; Middlemiss et al., 2016),  
392 which is dissociated into  $\text{NH}_3$  and  $\text{H}^+$ . The rate of  $\text{H}^+/\text{NH}_4^+$  excretion increases after  
393 moulting (Cameron and Wood, 1985) and may increase further during bacterial  
394 denitrification (Rijn et al., 2005). Under these conditions, the metabolism of excretion  
395 also contributes to the acidification of the medium, further reducing the capacity for  
396 calcium mobilisation by the crab, as observed in experiment 2. There is evidence that  
397 water acidification is more critical for the hardening process of marine crustaceans  
398 than for that of freshwater crustaceans. Unlike freshwater crustaceans, marine  
399 crustaceans have almost no internal reserves of calcium (gastroliths) and depend  
400 exclusively on the environment to supply the demand for  $\text{Ca}^{2+}$  (Greenaway, 1985;  
401 Passano, 1960; Wheatly, 1997).

402           In a similar manner, acidification might affect the deposition of magnesium in  
403 the crustacean exoskeleton. Although magnesium concentrations in water are  
404 relatively lower than those of calcium, magnesium also plays an important role in the  
405 hardening of the exoskeleton, and it is also obtained through water (Cameron and  
406 Wood, 1985; Clarke and Wheeler, 1922; Welinder, 1974) in a process that might be  
407 affected by pH (Tao et al., 2009).

408           In addition to  $\text{Ca}^{2+}$  and  $\text{Mg}^{2+}$  concentrations, the concentrations of  $\text{Na}^+$  and  $\text{K}^+$   
409 were monitored in this study. These two ions directly participate in important  
410 enzymatic activities that occur post-ecdysis (Towle and Mangum, 1985). Studies  
411 have shown that if the relative proportions of these two ions are altered, ammonia  
412 toxicity can occur due to the retention of ammonia by the organism and potentially  
413 compromise the animal's survival (Pan et al., 2006; Romano and Zeng, 2011; Zanotto

414 and Wheatly, 1993). However, were observed no significant effects of these ions in  
415 our experiments. It is possible that" the factors described above were much more  
416 important in influencing exoskeleton hardening and the probability of survival in *C.*  
417 *ornatus*.

418 There was also a direct relationship between the time to exoskeleton  
419 hardening and the mortality rate. However, the mortality rate was only 25% among  
420 those crabs that moulted after approximately 60 h. Those that did not moult died or  
421 remained alive until the end of the experiment. In addition, in all of the groups except  
422 those receiving periodic water renewal, there was an increase in mortality in the post-  
423 ecdysis phase. In this case, the analyses again indicated the influences of pH and  
424 total ammonia.

425 It is known that crabs (notably *C. sapidus*, the most studied species of the  
426 genus *Callinectes*) can tolerate a pH range of 6.5 to 8.5 (Hochheimer, 1988).  
427 Nevertheless, in artificial environments, it is recommended that pH be maintained  
428 between 7.0 and 8.0 (Oesterling, 1995). It is also known that there are behavioural  
429 and tolerance differences between young and adult animals in relation to pH  
430 (Laughlin et al., 1978). In Experiment 2 of the present study, pH values of 5.5 and 5.3  
431 were recorded in groups B1 and B2, respectively. In addition to having a direct effect  
432 on the organisms, a reduction of pH causes an increase in the nitrous acid fraction  
433 ( $\text{HNO}_2$ ) present in water;  $\text{HNO}_2$  is toxic to aquatic organisms (Ary and Poirrier, 1989;  
434 Lin and Chen, 2003; Russo et al., 1981; Seneriches-Abiera et al., 2007).

435 The toxicity of ammonia, in turn, is directly proportional to pH and  $\text{NH}_3$   
436 concentrations. Romano and Zeng (2007) estimated an  $\text{LC}_{50}$  for juveniles of *Scylla*  
437 *serrata* of 6.81 mg/L  $\text{NH}_3\text{-N}$ . Koo et al. (2005) reported that at least 50% of juveniles

438 of *Orithyia sinica* survived for 30 days at approximately 2.33 mg/L NH<sub>3</sub>-N. Lakshmi  
439 (1984) reported a mortality rate of 20% in *C. sapidus* in pre-ecdysis at 1.41 mg/L  
440 NH<sub>3</sub>, which increased to 100% at 2.31 mg/L NH<sub>3</sub>. In our experiments, a pH reduction  
441 was observed over time, which indicated that the NH<sub>3</sub> concentrations remained  
442 sufficiently low as to rule out any toxic effects of ammonia on *C. ornatus*.

443         Regarding nitrite, there is no consensus regarding the concentrations at which  
444 this compound is toxic to crabs. Lakshmi (1984) and Ary and Poirrier (1989) reported  
445 that the survival of *C. sapidus* was only affected at NO<sub>2</sub><sup>-</sup> concentrations above 10  
446 mg/L. According to those authors, crab mortality reached 100% only after 96 h of  
447 exposure to concentrations between 50 and 150 mg/L in water with a pH close to 8.  
448 In contrast, Manthe et al. (1984) found that the moulting efficiency of *C. sapidus* was  
449 affected by nitrite concentrations close to 2 mg/L. In the present study, the nitrite  
450 concentration reached 7.6 mg/L. Thus, it is possible that the observed mortality might  
451 have been influenced by both pH and nitrite levels during the experiments and that  
452 they had a cumulative effect. Moreover, a long hardening time, which exposed the  
453 animals to unfavourable physiological conditions, appears to have significantly  
454 increased the risk of death.

## 455 **Conclusion**

456         Moulting in *C. ornatus* exhibited strong relationships with the characteristics of  
457 the crab's aquatic medium. The crabs drastically altered the physical and chemical  
458 characteristics of the water, mainly through processes related to acidification and  
459 ammonification. These alterations, in turn, directly interfered with exoskeleton  
460 hardening, causing the exoskeletons of the animals to remain at soft or paper  
461 consistency for periods of up to 5 days. Commercially, the establishment of such



462 periods would allow crabs to be marketed as soft-shell crabs within a time window  
463 more than 20 times longer than that typically observed. If the results observed here  
464 can be replicated at the commercial scale, large reductions in workload and  
465 operational costs could be obtained, increasing the efficiency and viability of large-  
466 scale crab production.

## 467 **Acknowledgements**

468 We thank GIA (Grupo Integrado de Aquicultura e Estudos Ambientais), Universidade  
469 Federal do Paraná and Instituto Federal do Paraná for the opportunity of conducting  
470 soft-crabs studies. Thanks to Vitor Rossi, Marcelo F. A. Pinto, Nathiele Cozer and  
471 Amanda C. Albuquerque for the collaboration during the experiments. Additionally,  
472 we thank the fishermen Zeca Tavares, Túlio and Andréa for the crabs experimental  
473 capture. This study is a result of the Master degree thesis of DBH under the post-  
474 graduate initiative “PPG Zootecnia, Universidade Federal do Paraná - UFPR”.

## 475 **Competing interests**

476 No competing interests declared.

## 477 **Funding**

478 This study was supported by the “Conselho Nacional de Desenvolvimento Científico  
479 e Tecnológico – CNPq” (process 302609/2013-0) granted to Dr Antonio Ostrensky,  
480 and by CNPq financing of the projects associated with this manuscript (processes  
481 381091/2014-7, 473959-2013, 403705/2013-4 and 468251/2014-6). DBH receives a  
482 scholarship from CNPq (DTI, process 381091/2014-7). ACR receives a scholarship  
483 from CAPES Pró-Amazônia Program (process 1644571).

## 484 **Bibliography**

485 **Ary, R. D. and Poirrier, M. A.** (1989). Acute Toxicity of Nitrite to the  
486 Blue Crab (*Callinectes sapidus*). *The Progressive Fish-Culturist* **51**, 69-72.

487 **Büldt, A. and Karst, U.** (1999). Determination of Nitrite in Waters by  
488 Microplate Fluorescence Spectroscopy and HPLC with Fluorescence  
489 Detection. *Analytical Chemistry* **71**, 3003-3007.

490 **Cameron, J. N.** (1985). Post-moult calcification in the blue crab  
491 (*Callinectes sapidus*): relationships between apparent net H<sup>+</sup> excretion,  
492 calcium and bicarbonate. *Journal of Experimental Biology* **119**, 275.

493 **Cameron, J. N. and Wood, C. M.** (1985). Apparent H<sup>+</sup> Excretion and  
494 CO<sub>2</sub> Dynamics Accompanying Carapace Mineralization in the Blue Crab  
495 (*Callinectes Sapidus*) Following Moulting. *Journal of Experimental Biology*  
496 **114**, 181-196.

497 **Carvalho, F. L. d. and Couto, E. d. C. G.** (2011). Environmental  
498 variables influencing the *Callinectes* (Crustacea: Brachyura: Portunidae)  
499 species distribution in a tropical estuary—Cachoeira River (Bahia, Brazil).  
500 *Journal of the Marine Biological Association of the United Kingdom* **91**,  
501 793-800.

502 **Clarke, F. E.** (1950). Determination of chloride in water improved  
503 colorimetric and titrimetric methods. *Analytical Chemistry* **22**, 553-555.

504 **Clarke, F. W. and Wheeler, W. C.** (1922). The inorganic  
505 constituents of marine invertebrates. Washington: US Government Printing  
506 Office.

- 507           **Detours, P., Armand, J. and Verriest, G.** (1968). Carbon dioxide  
508 dissociation curves of water and gas exchange of water-breathers.  
509 *Respiration Physiology* **5**, 23-33.
- 510           **Drach, P.** (1939). Mue et cycle d'intermue chez les crustaces  
511 decapodes. *Ann Inst Oceanogr Monaco* **19**, 103 - 391.
- 512           **Drach, P. and Tchernigovtzeff, C.** (1967). Sur la méthode de  
513 détermination des stades d'intermue et son application générale aux  
514 crustacés. *Vie milieu* **18**, 595-609.
- 515           **FAO.** (2013). Global Capture Production (FishStat), vol. 2015.  
516 [http://data.fao.org/dataset-data-filter?entryId=af556541-1c8e-4e98-8510-](http://data.fao.org/dataset-data-filter?entryId=af556541-1c8e-4e98-8510-1b2cafba5935&tab=data)  
517 [1b2cafba5935&tab=data](http://data.fao.org/dataset-data-filter?entryId=af556541-1c8e-4e98-8510-1b2cafba5935&tab=data): Food and Agriculture Organization of the United  
518 Nations.
- 519           **Freeman, J. and Perry, H.** (1985). The crustacean molt cycle and  
520 hormonal regulation: its importance in soft shell blue crab production.  
521 *Proceedings of the National Symposium on the Soft-Shelled Blue Crab*  
522 *Fishery*, 23 - 30.
- 523           **Freeman, J. A., Kilgus, G., Laurendeau, D. and Perry, H. M.**  
524 (1987). Postmolt and intermolt molt cycle stages of *Callinectes sapidus*.  
525 *Aquaculture* **61**, 201-209.
- 526           **Gaudé, A. and Anderson, J. A.** (2011). Soft shell crab shedding  
527 systems, pp. 1-6: Southern Regional Aquaculture Center
- 528           **Granado e Sá, M., Baptista, B. B., Farah, L. S., Leite, V. P. and**  
529 **Zanotto, F. P.** (2010). Calcium transport and homeostasis in gill cells of a

530 freshwater crab *Dilocarcinus pagei*. *Journal of Comparative Physiology B*  
531 **180**, 313-321.

532 **Greenaway, P.** (1974). Calcium Balance at the Postmoult Stage of  
533 the Freshwater Crayfish. *Journal of Experimental Biology* **61**, 35.

534 **Greenaway, P.** (1983). Uptake of calcium at the postmoult stage by  
535 the marine crabs *Callinectes sapidus* and *Carcinus maenas*. *Comparative*  
536 *Biochemistry and Physiology Part A: Physiology* **75**, 181-184.

537 **Greenaway, P.** (1985). CALCIUM BALANCE AND MOULTING IN  
538 THE CRUSTACEA. *Biological Reviews* **60**, 425-454.

539 **Hochheimer, J.** (1988). Water Quality in Soft Crab Shedding:  
540 Maryland Sea Grant Extension Program.

541 **Koo, J. G., Kim, S. G., Jee, J. H., Kim, J. M., Bai, S. C. and Kang,**  
542 **J. C.** (2005). Effects of ammonia and nitrite on survival, growth and  
543 moulting in juvenile tiger crab, *Orithyia sinica* (Linnaeus). *Aquaculture*  
544 *Research* **36**, 79-85.

545 **Lakshmi, G.** (1984). The Effect of ammonia accumulation on blue  
546 crab shedding success: final report, March, 1983 through December, 1983.

547 **Laughlin, R. A., Cripe, C. R. and Livingston, R. J.** (1978). Field  
548 and Laboratory Avoidance Reactions by Blue Crabs (*Callinectes sapidus*)  
549 to Storm Water Runoff. *Transactions of the American Fisheries Society*  
550 **107**, 78-86.

551 **Lin, Y.-C. and Chen, J.-C.** (2003). Acute toxicity of nitrite on  
552 *Litopenaeus vannamei* (Boone) juveniles at different salinity levels.  
553 *Aquaculture* **224**, 193-201.

- 554           **Mangum, C. P., deFur, P., Fields, J., Henry, R., Kormanik, G.,**  
555 **McMahon, B., Ricci, J., Towle, D. and Wheatly, M.** (1985). Physiology of  
556 the blue crab *Callinectes sapidus* Rathbun during a molt. In *National*  
557 *Symposium on the Soft-Shell Blue Crab Fishery*, pp. 1-12.
- 558           **Manthe, D. P., Malone, R. F. and Kumar, S.** (1984). Limiting factors  
559 associated with nitrification in closed blue crab shedding systems.  
560 *Aquacultural Engineering* **3**, 119-140.
- 561           **Melo-Filho, G. A. S. d.** (1996). Manual de identificacao dos  
562 brachyura (caranguejos e siris) do litoral brasileiro. São Paulo:  
563 Plêiade/FAPESP.
- 564           **Middlemiss, K. L., Urbina, M. A. and Wilson, R. W.** (2016). Effects  
565 of seawater alkalinity on calcium and acid–base regulation in juvenile  
566 European lobster (*Homarus gammarus*) during a moult cycle. *Comparative*  
567 *Biochemistry and Physiology Part A: Molecular & Integrative Physiology*  
568 **193**, 22-28.
- 569           **Mukaka, M. M.** (2012). Statistics Corner: A guide to appropriate use  
570 of Correlation coefficient in medical research. *Malawi Medical Journal* **24**,  
571 3.
- 572           **Neufeld, D. S. and Cameron, J. N.** (1992). Postmoult Uptake of  
573 Calcium by the Blue Crab (*Callinectes Sapidus*) in Water of low Salinity.  
574 *Journal of Experimental Biology* **171**, 283.
- 575           **Newcombe, C. L., Sandoz, M. D. and Rogers-Talbert, R.** (1949).  
576 Differential growth and moulting characteristics of the blue crab,

577 *Callinectes sapidus* Rathbun. *Journal of Experimental Zoology* **110**, 113-  
578 152.

579 **Oesterling, M. J.** (1995). Manual for handling and shedding blue  
580 crabs (*Callinectes sapidus*). In *Virginia Sea Grant College*, pp. 91.  
581 Gloucester Point, Va: Virginia Institute of Marine Science.

582 **Pan, L.-Q., Luan, Z.-H. and Jin, C.-X.** (2006). Effects of Na<sup>+</sup>/K<sup>+</sup> and  
583 Mg<sup>2+</sup>/Ca<sup>2+</sup> ratios in saline groundwaters on Na<sup>+</sup>-K<sup>+</sup>-ATPase activity,  
584 survival and growth of *Marsupenaeus japonicus* postlarvae. *Aquaculture*  
585 **261**, 1396-1402.

586 **Passano, L.** (1960). Molting and its control. *The Physiology of*  
587 *Crustacea* **1**, 473-536.

588 **Perry, H., Graham, D., Trigg, C. and Crochet, G.** (2010).  
589 Expansion of the Soft Crab Fishery in Mississippi Using Cultured Blue  
590 Crabs, vol. 63, pp. 5: Gulf and Caribbean Fisheries Institute, c/o Harbor  
591 Branch Oceanographic Institution, Inc. Fort Pierce FL 34946 United  
592 States.

593 **Perry, H., Trigg, C., Larsen, K., Freeman, J., Erickson, M. and**  
594 **Henry, R.** (2001). Calcium concentration in seawater and exoskeletal  
595 calcification in the blue crab, *Callinectes sapidus*. *Aquaculture* **198**, 197-  
596 208.

597 **Rijn, J. v., Tal, Y. and Schreier, H. J.** (2005). Denitrification in  
598 recirculating systems: Theory and applications. *Aquaculture Engineering*  
599 **34**, 12.

600           **Robertson, J. D.** (1960). Ionic regulation in the crab *Carcinus*  
601 *maenas* (L.) in relation to the moulting cycle. *Comparative Biochemistry*  
602 *and Physiology* **1**, 183-212.

603           **Romano, N. and Zeng, C.** (2007). Acute toxicity of ammonia and its  
604 effects on the haemolymph osmolality, ammonia-N, pH and ionic  
605 composition of early juvenile mud crabs, *Scylla serrata* (Forskål).  
606 *Comparative Biochemistry and Physiology Part A: Molecular & Integrative*  
607 *Physiology* **148**, 278-285.

608           **Romano, N. and Zeng, C.** (2011). Importance of balanced Na<sup>+</sup>/K<sup>+</sup>  
609 ratios for blue swimmer crabs, *Portunus pelagicus*, to cope with elevated  
610 ammonia-N and differences between in vitro and in vivo gill Na<sup>+</sup>/K<sup>+</sup>-  
611 ATPase responses. *Aquaculture* **318**, 154-161.

612           **Russo, R. C., Thurston, R. V. and Emerson, K.** (1981). Acute  
613 Toxicity of Nitrite to Rainbow Trout (*Salmo gairdneri*): Effects of pH, Nitrite  
614 Species, and Anion Species. *Canadian Journal of Fisheries and Aquatic*  
615 *Sciences* **38**, 387-393.

616           **Seneriches-Abiera, M. L., Parado-Esteva, F. and Gonzales, G. A.**  
617 (2007). Acute toxicity of nitrite to mud crab *Scylla serrata* (Forsskål)  
618 larvae. *Aquaculture Research* **38**, 1495-1499.

619           **Tao, J., Zhou, D., Zhang, Z., Xu, X. and Tang, R.** (2009).  
620 Magnesium-aspartate-based crystallization switch inspired from shell molt  
621 of crustacean. *Proceedings of the National Academy of Sciences* **106**,  
622 22096-22101.

623 **Towle, D. W. and Mangum, C. P.** (1985). Ionic regulation and  
624 transport ATPase activities during the molt cycle in the blue crab  
625 *Callinectes sapidus*. *Journal of crustacean biology* **5**, 216-222.

626 **Wehrtmann, I. S. and Mena-Castañeda, D.** (2003). molt sign  
627 description of the pacific blue crab *Callinectes arcuatus* Ordway 1863  
628 (Decapoda, Portunidae). *Nauplius* **11**, 135-139.

629 **Welinder, B. S.** (1974). The crustacean cuticle - I. Studies on the  
630 composition of the cuticle. *Comparative Biochemistry and Physiology Part*  
631 *A: Physiology* **47**, 779-787.

632 **Wheatly, M., Zhang, Z., Weil, J., Rogers, J. and Stiner, L.** (2001).  
633 Novel subcellular and molecular tools to study Ca(2+) transport  
634 mechanisms during the elusive moulting stages of crustaceans: flow  
635 cytometry and polyclonal antibodies. *Journal of Experimental Biology* **204**,  
636 959-966.

637 **Wheatly, M. G.** (1997). Crustacean Models for Studying Calcium  
638 Transport: The Journey from Whole Organisms to Molecular Mechanisms.  
639 *Journal of the Marine Biological Association of the United Kingdom* **77**,  
640 107-125.

641 **Wheatly, M. G.** (1999). Calcium homeostasis in crustacea: The  
642 evolving role of branchial, renal, digestive and hypodermal epithelia.  
643 *Journal of Experimental Zoology* **283**, 620-640.

644 **Wheatly, M. G., Zanotto, F. P. and Hubbard, M. G.** (2002). Calcium  
645 homeostasis in crustaceans: subcellular Ca dynamics. *Comparative*



646 *Biochemistry and Physiology Part B: Biochemistry and Molecular Biology*  
647 **132**, 163-178.

648 **Zanotto, F. P. and Wheatly, M. G.** (1993). The Effect of Ambient pH  
649 on Electrolyte Regulation During the Postmoult Period in Freshwater  
650 Crayfish *Procambarus clarkii*. *Journal of Experimental Biology* **178**, 1.

651 **Zanotto, F. P. and Wheatly, M. G.** (2002). Calcium balance in  
652 crustaceans: nutritional aspects of physiological regulation. *Comparative*  
653 *Biochemistry and Physiology Part A: Molecular & Integrative Physiology*  
654 **133**, 645-660.

655 **Zeebe, R. E. and Wolf-Gladrow, D. A.** (2001). CO<sub>2</sub> in seawater:  
656 equilibrium, kinetics, isotopes: Gulf Professional Publishing.

657
